# Supplementary material for: On the nature of inter-anion coinage bonds
Source: Royal Society of Chemistry journal article supplement (doi:10.1039/d3cp00978e), 2023-01-01
Supplement: d3cp00978e1.pdf [file d3cp00978e1.pdf]

Supporting Information for:

# On the Nature of Inter-Anion Coinage Bonds

*Jiayao Li<sup>[a]</sup>, Qiuyan Feng<sup>[a]</sup>, Changwei Wang<sup>\*[a]</sup> and Yirong Mo<sup>\*[b]</sup>*

<sup>[a]</sup> Key Laboratory for Macromolecular Science of Shaanxi Province, School of Chemistry & Chemical Engineering, Shaanxi Normal University, Xi'an 710119, China.

<sup>[b]</sup> Department of Nanoscience, Joint School of Nanoscience and Nanoengineering, University of North Carolina at Greensboro, Greensboro, NC 27401, USA.

## AUTHOR INFORMATION

Corresponding Author

\* [snnu.changweiwang@snnu.edu.cn](mailto:snnu.changweiwang@snnu.edu.cn); [y\\_mo3@uncg.edu](mailto:y_mo3@uncg.edu).

|                                                                                                                                                                                                                                                                                                                                                                               |    |
|-------------------------------------------------------------------------------------------------------------------------------------------------------------------------------------------------------------------------------------------------------------------------------------------------------------------------------------------------------------------------------|----|
| <b>Fig. S1.</b> Profiles of binding energy along the inter-anion distance for complexes <b>1-6</b> calculated at a series of theoretical levels. ....                                                                                                                                                                                                                         | 6  |
| <b>Fig. S2.</b> Profiles of binding energy along with the variation in inter-anion distance calculated at RI-DLPNO-CCSD// $\omega$ B97x-D2/def2-TZVP theoretical level. RI-DLPNO-CCSD//def2-QZVPP//SCS-MP2/def2-QZVP theoretical level (s) were also employed for complex $[\text{AuCl}_4]^- \cdots [\text{AuCl}_4]^-$ in order to confirm the absence of metastability. .... | 12 |
| <b>Fig. S3.</b> Evolutions of the inter-anion distance over time (after the 1500st fs) in the AIMD simulation, with the averaged value ( $R$ ), and the corresponding maximal and minimum deviations denoted. ....                                                                                                                                                            | 13 |
| <b>Fig. S4.</b> The electrostatic interaction along the inter-anion distance calculated using the BLW-ED method (in blue) and AMOEBA polarizable force field (in grey). ....                                                                                                                                                                                                  | 14 |
| <b>Table S1.</b> Polarizabilities (along the direction of CiBs) of optimized and deformed monomers ( $\alpha$ , in a.u.) at $\omega$ B97x-D2/def2-TZVP(-PP) theoretical level. ....                                                                                                                                                                                           | 14 |
| <b>Table S2.</b> Amount of charge ( $\Delta Q$ ) transferred from the Lewis base to the acid, calculated using the NPA. ....                                                                                                                                                                                                                                                  | 14 |
| <b>Table S3.</b> The distances ( $\text{\AA}$ ) of CiBs in the local minimum ( $R_{\text{LM}}$ ) and transition structure ( $R_{\text{TS}}$ ), and well-depthes (in kJ/mol) derived from the binding energy profiles calculated at RI-DLPNO-CCSD// $\omega$ B97x-D2/def2-TZVPD theoretical level. ....                                                                        | 15 |
| The xyz coordinates (in $\text{\AA}$ ) of inter-anion CiBs optimized at $\omega$ B97x-D2/def2-TZVP level of theory. ....                                                                                                                                                                                                                                                      | 15 |

## Additional Figures

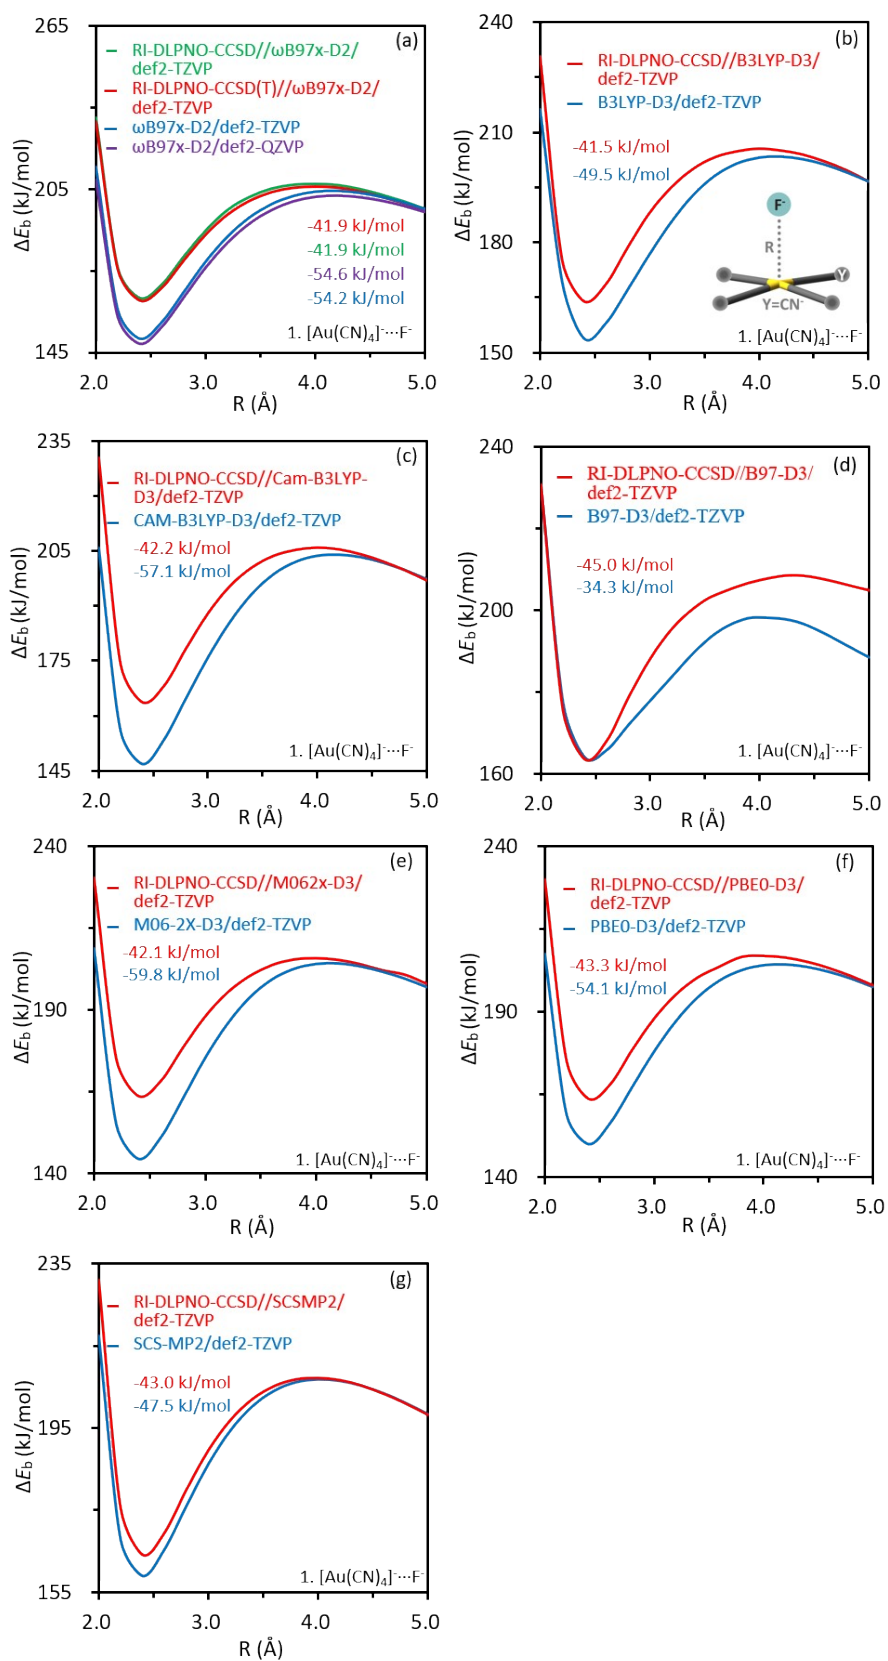

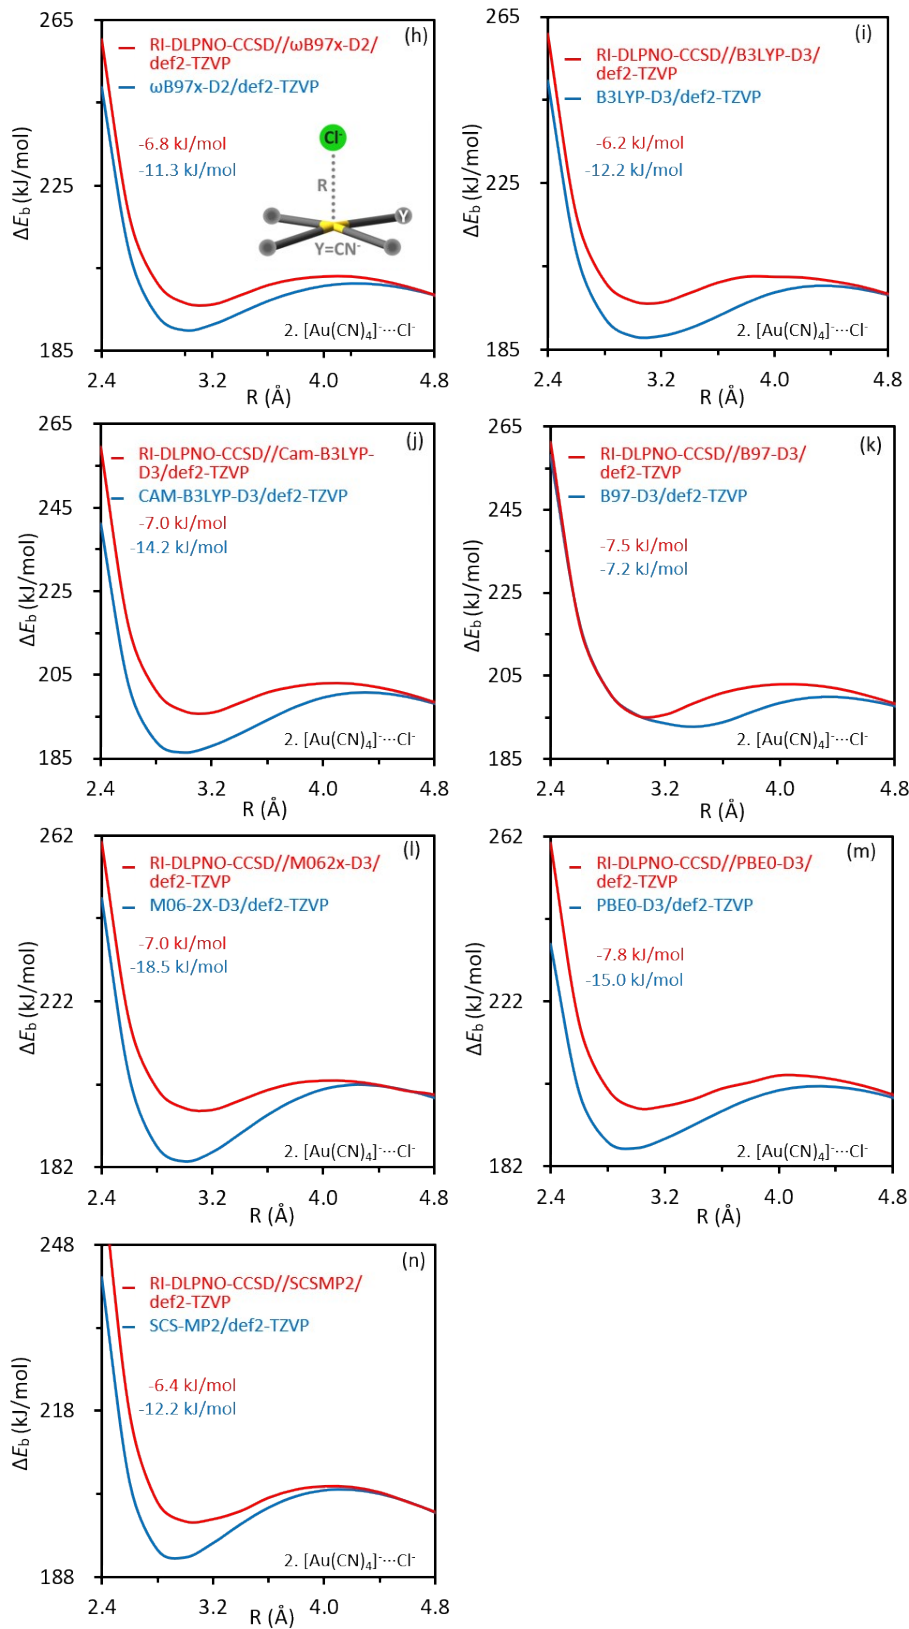

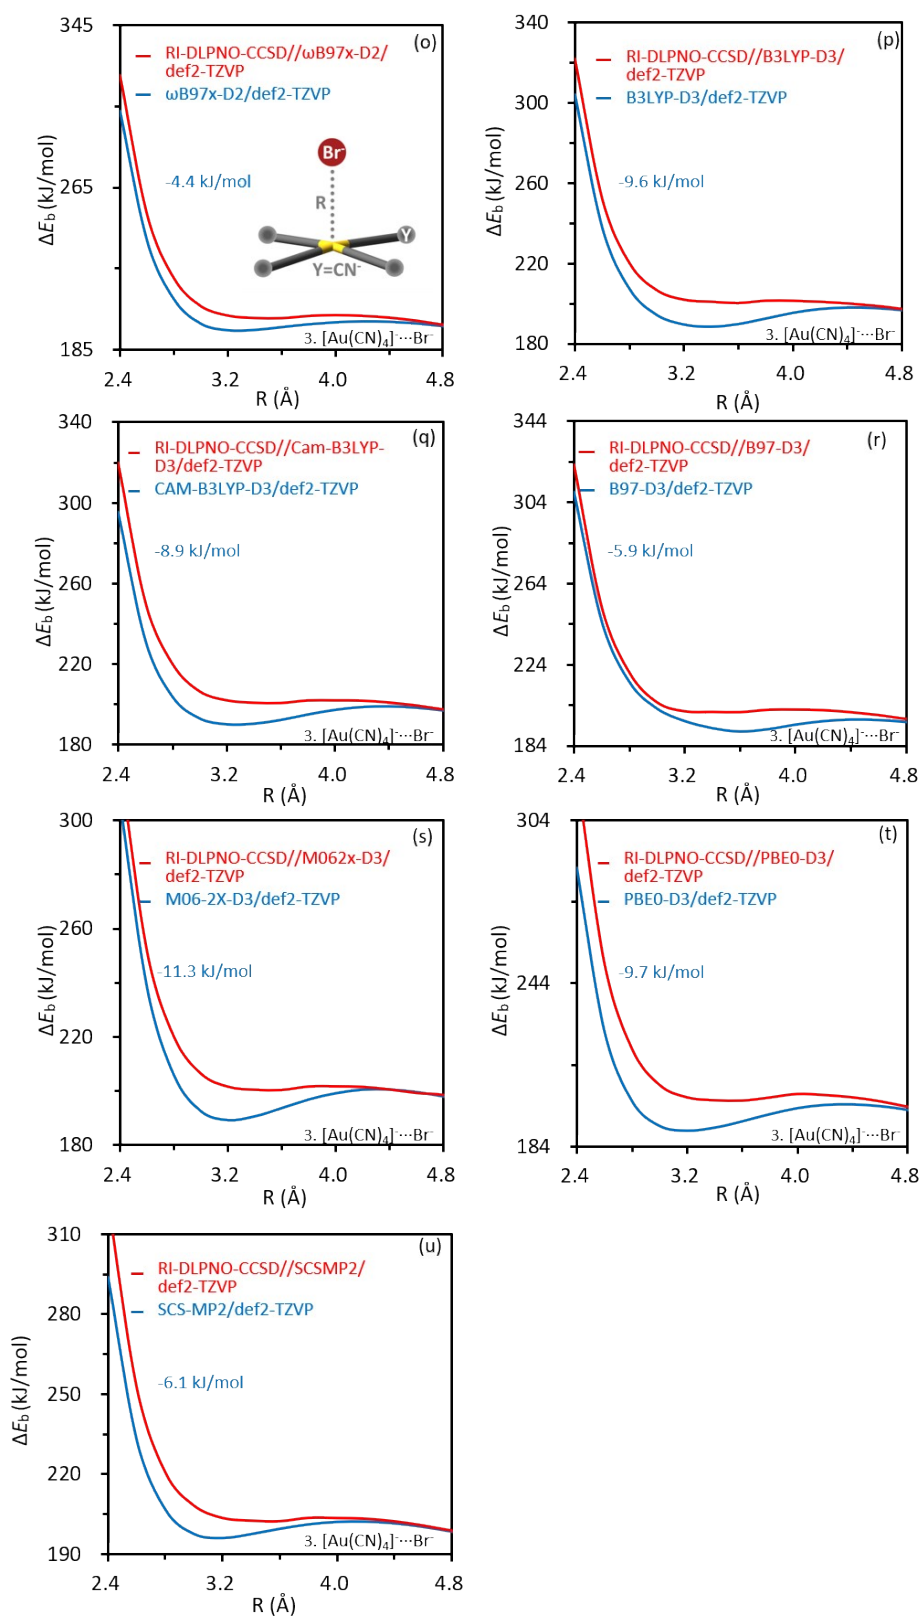

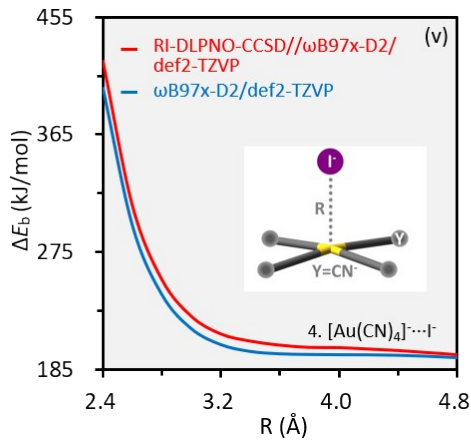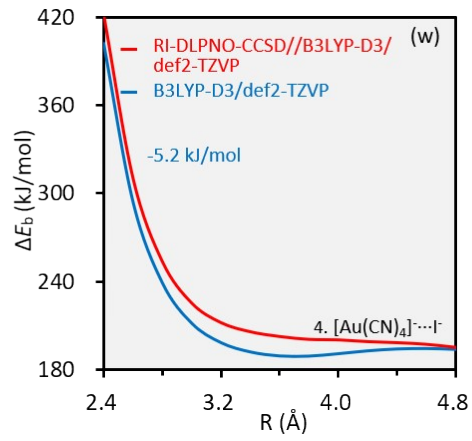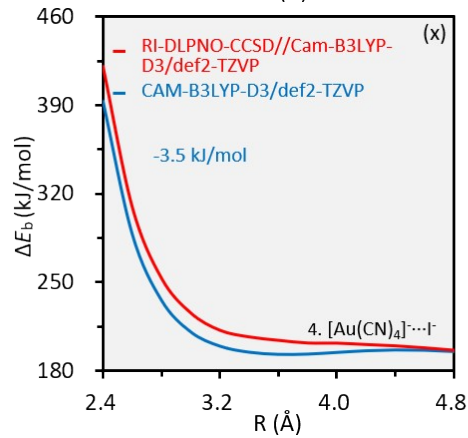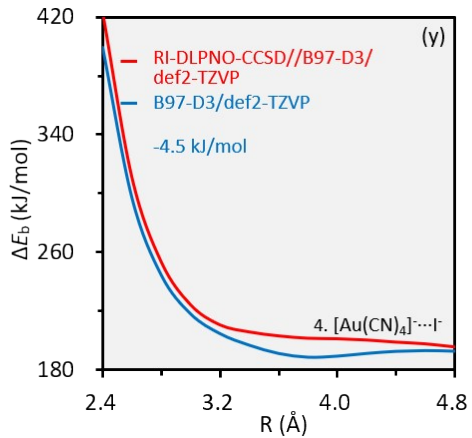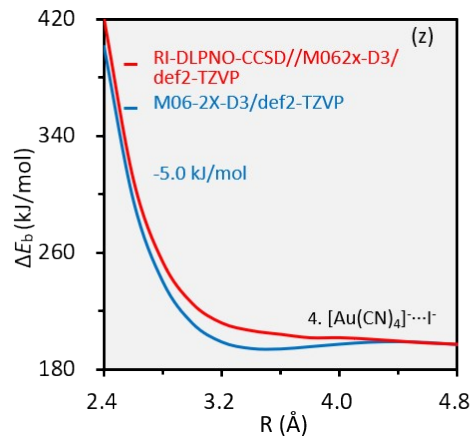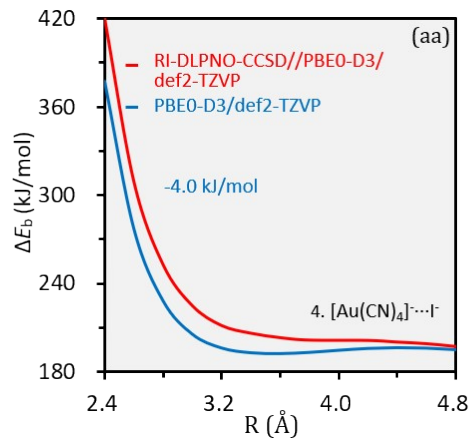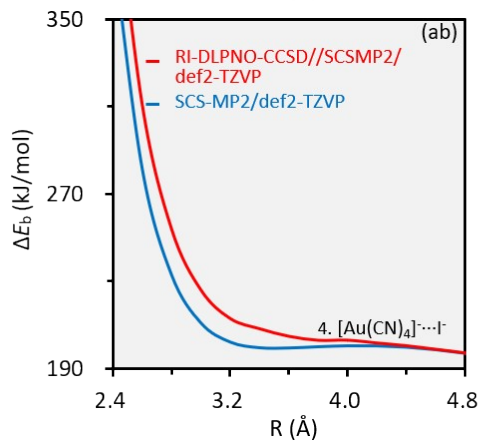

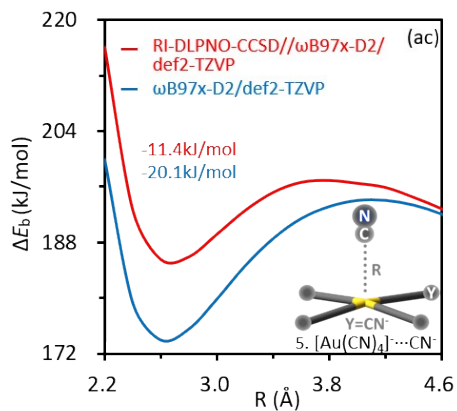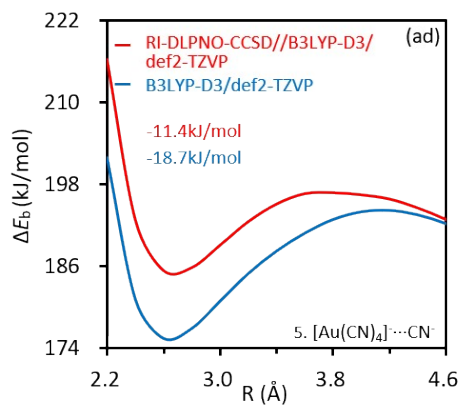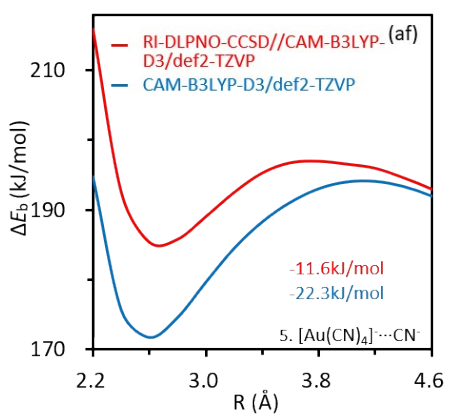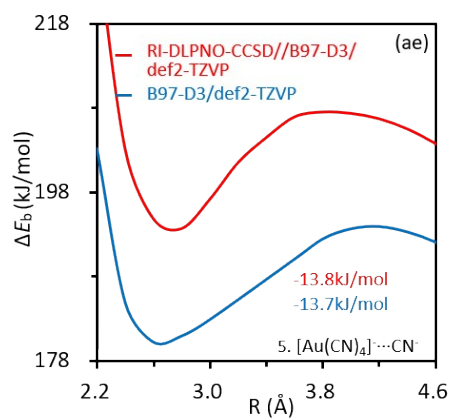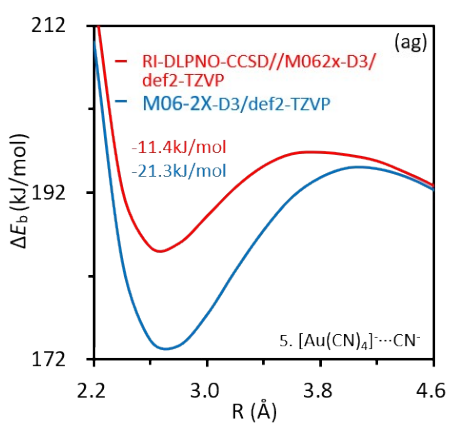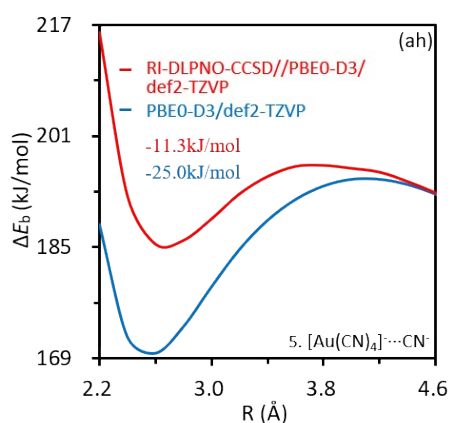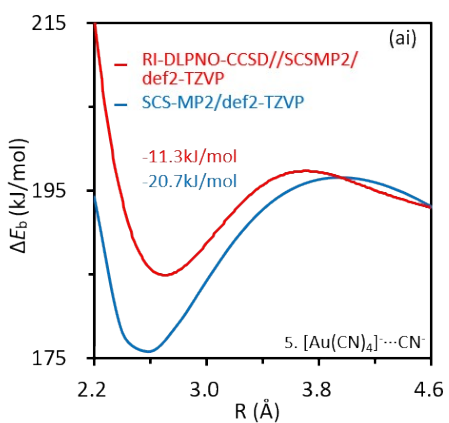

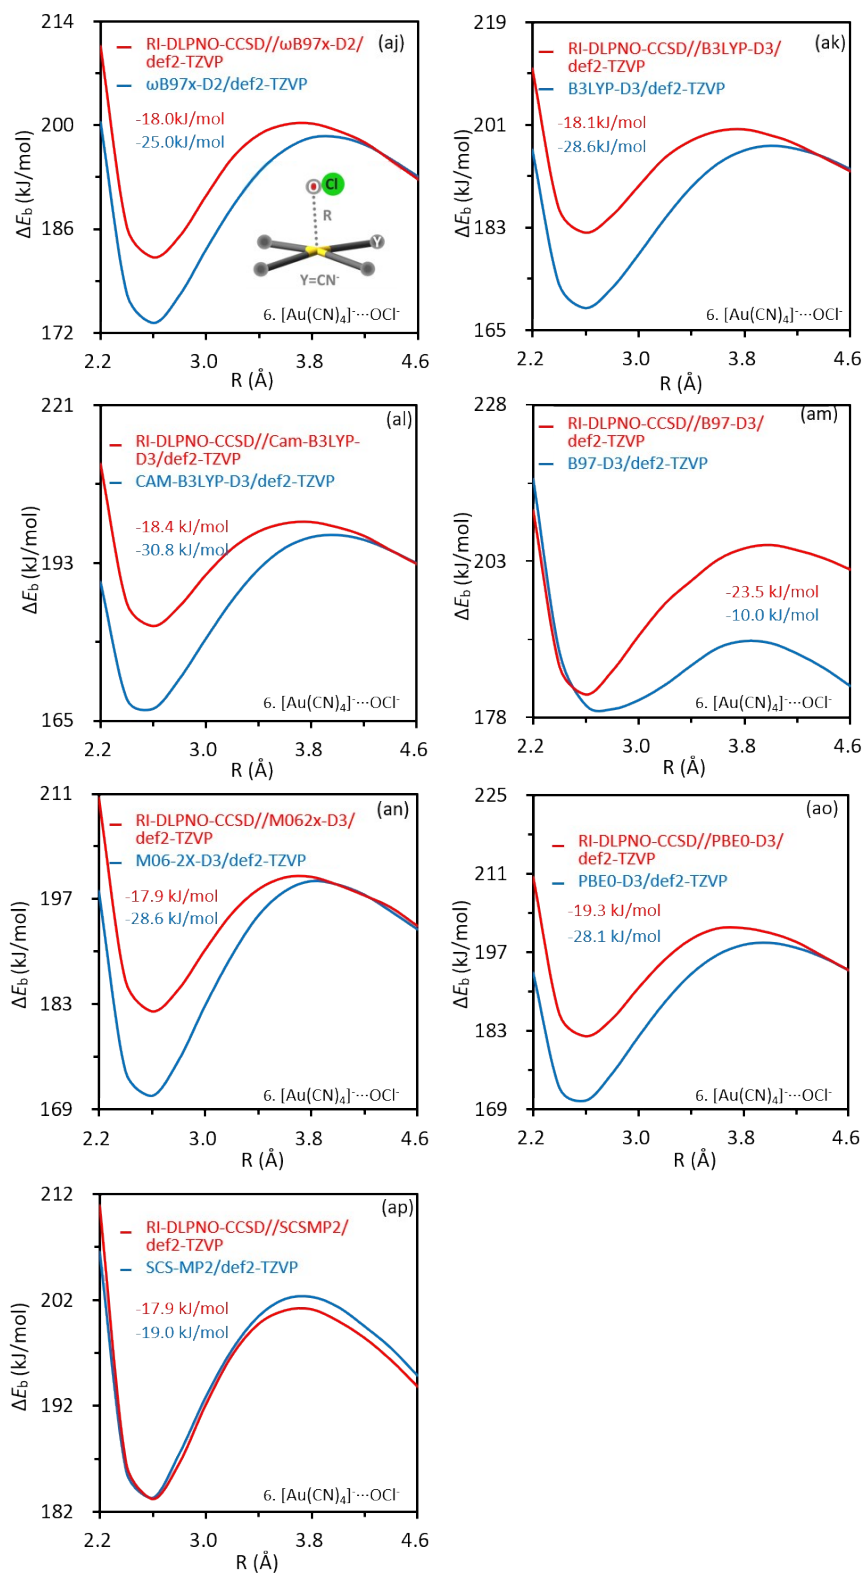

**Fig. S1.** Profiles of binding energy along the inter-anion distance for complexes 1-6 calculated at a series of theoretical levels.



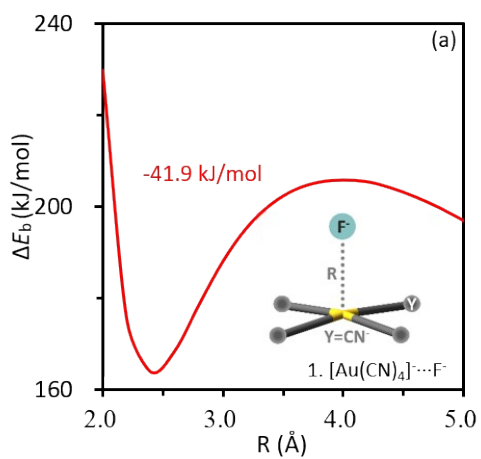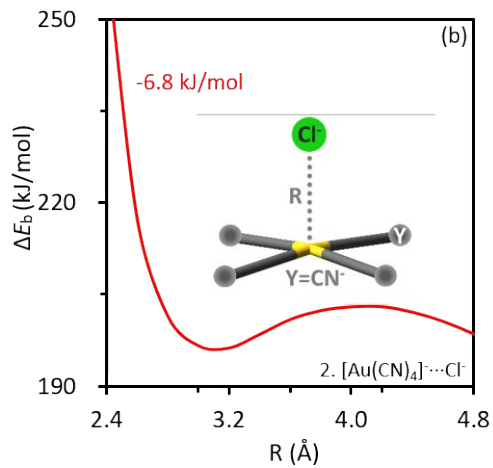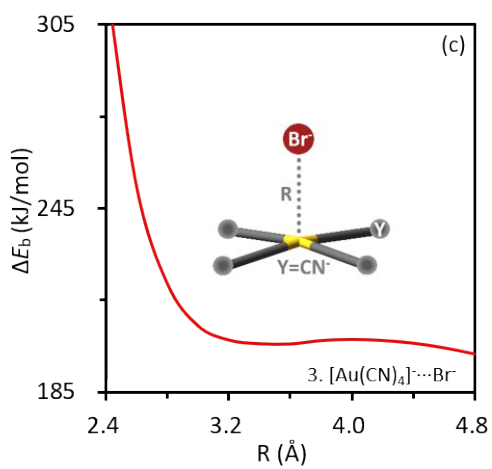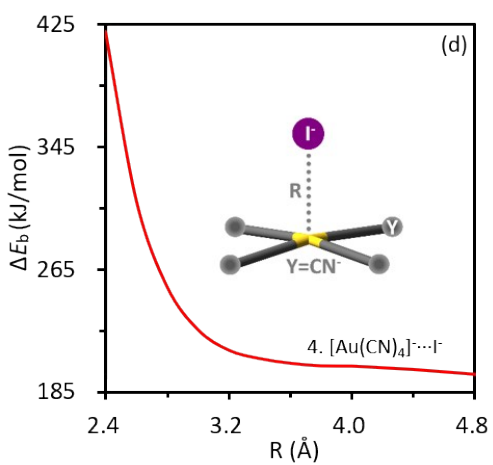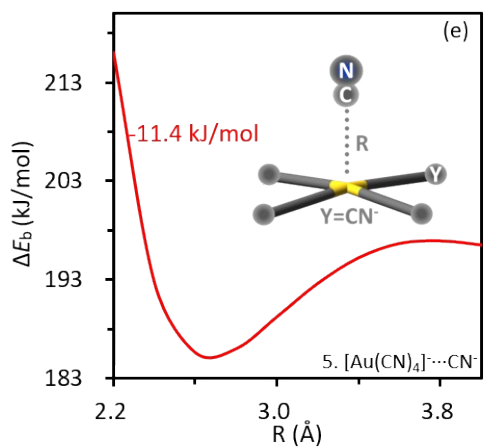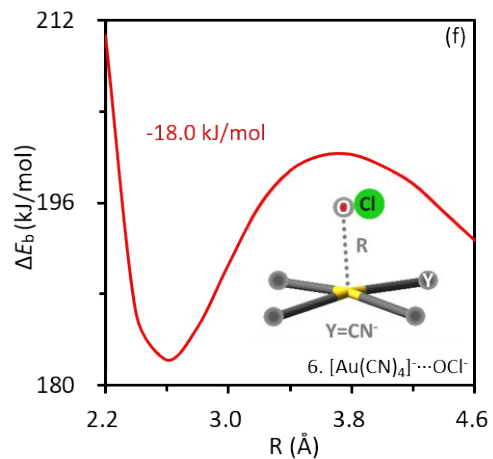

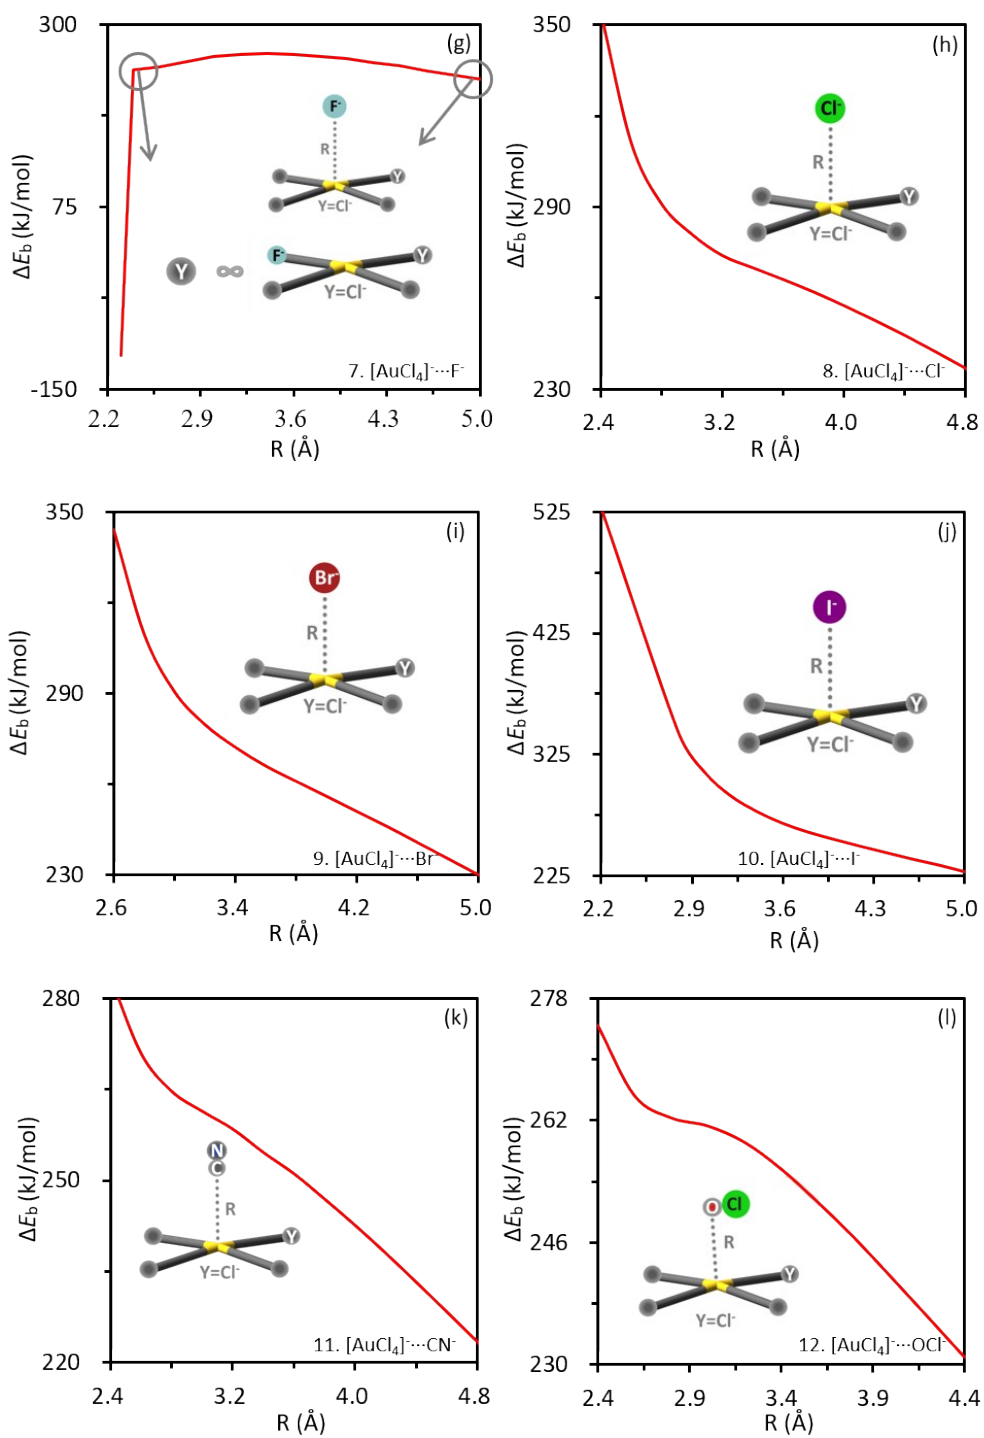

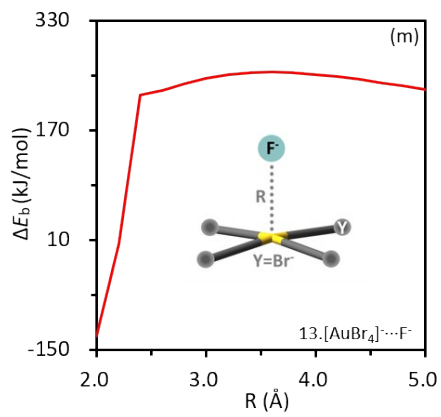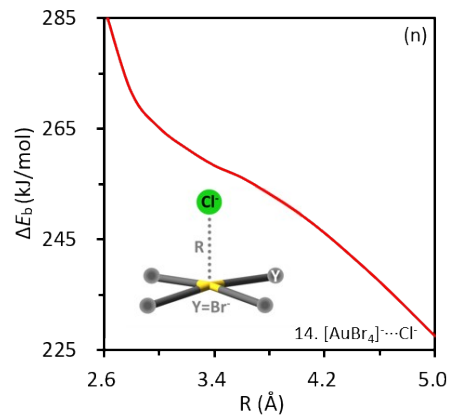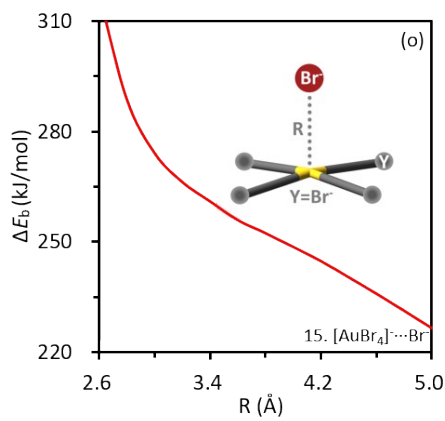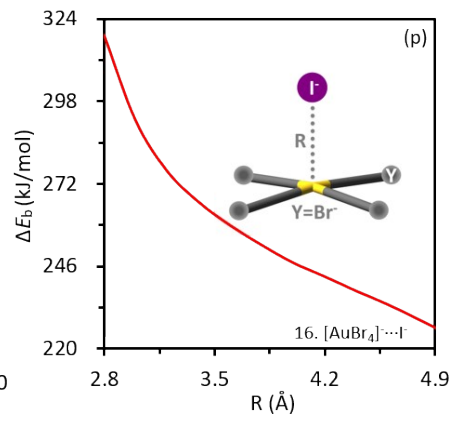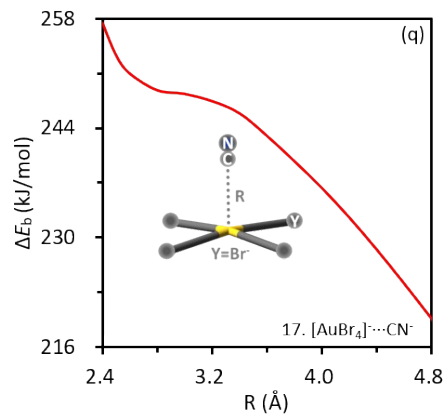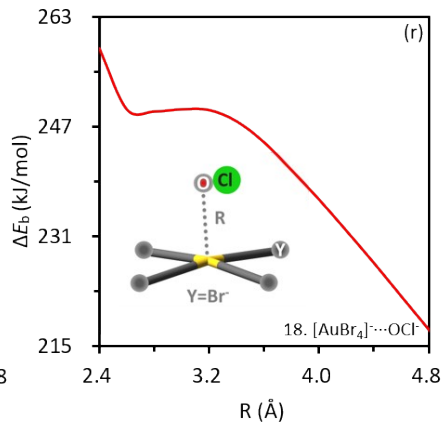

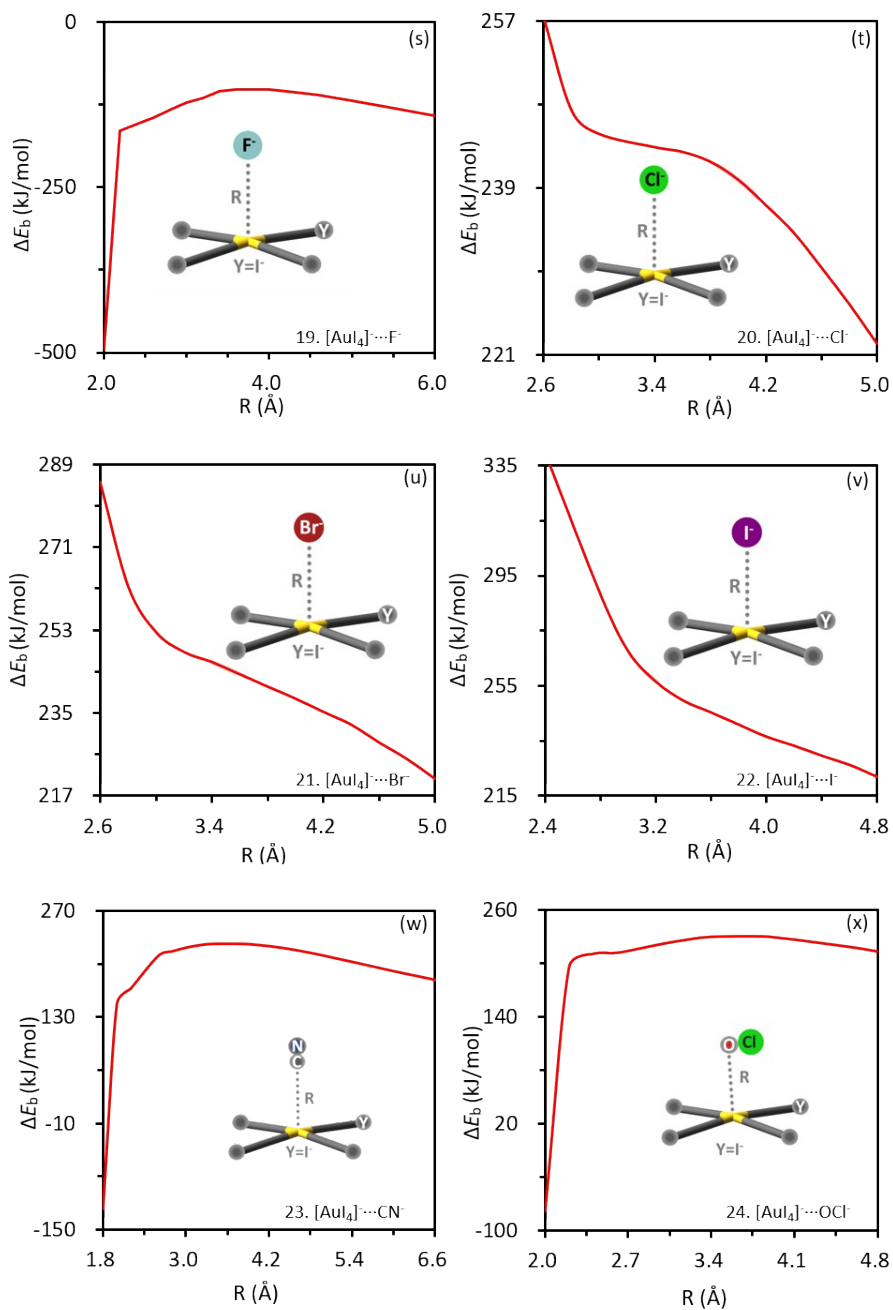

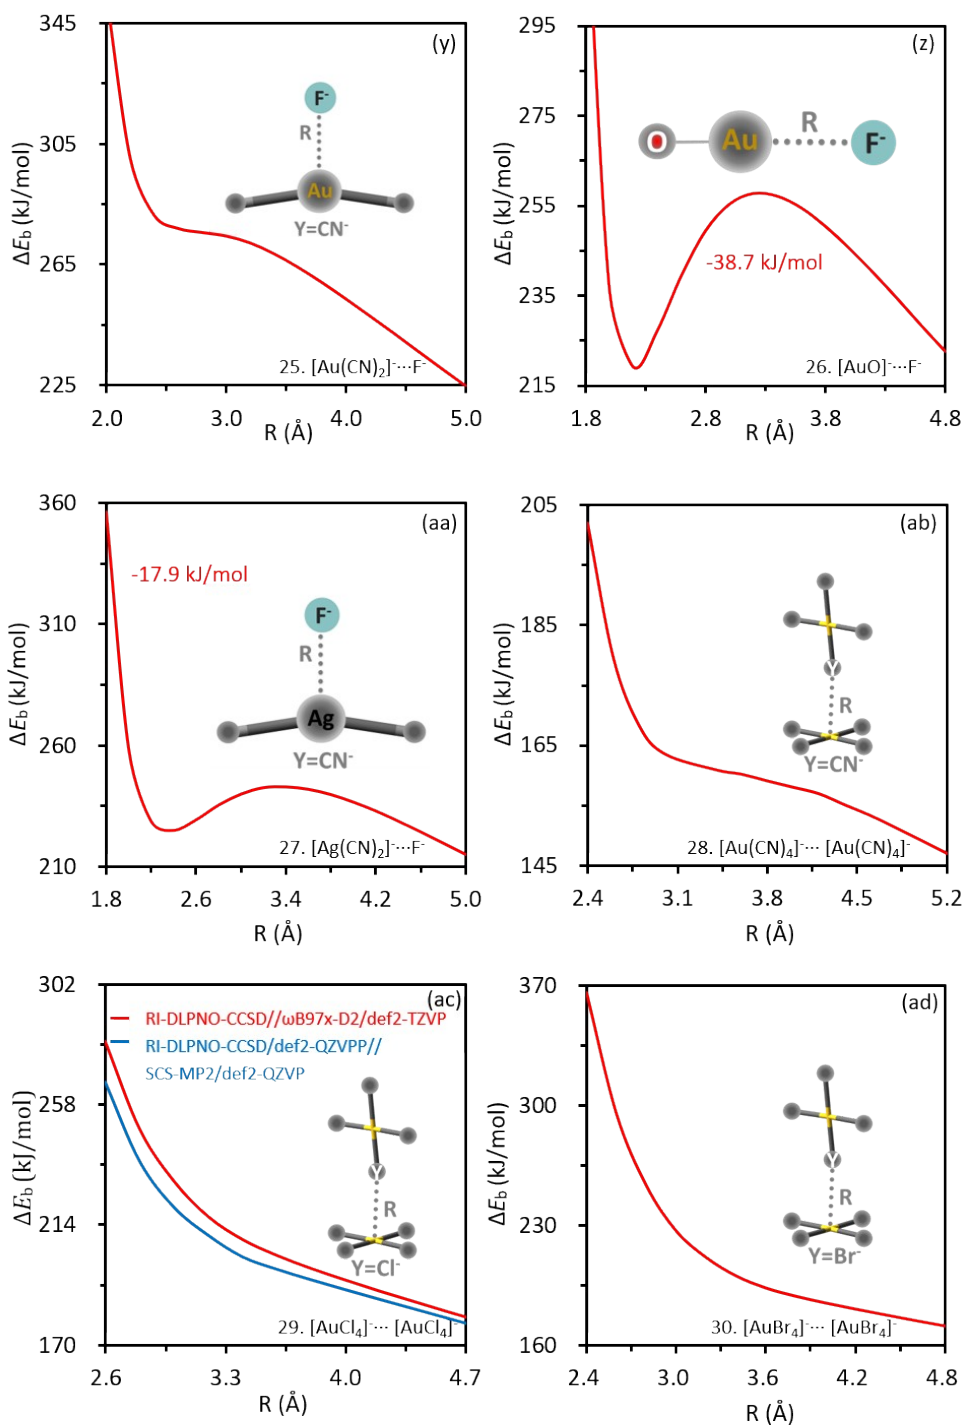

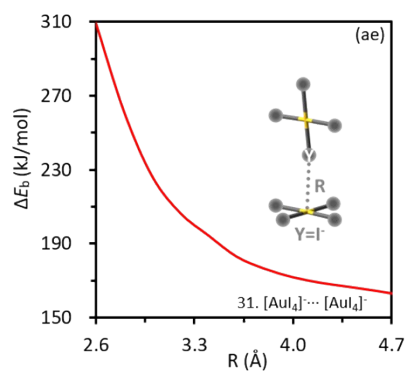

**Fig. S2. Profiles of binding energy along with the variation in inter-anion distance calculated at RI-DLPNO-CCSD// $\omega$ B97x-D2/def2-TZVP theoretical level. RI-DLPNO-CCSD//def2-QZVPP//SCS-MP2/def2-QZVP theoretical level (s) were also employed for complex  $[\text{AuCl}_4]^- \cdots [\text{AuCl}_4]^-$  in order to confirm the absence of metastability.**

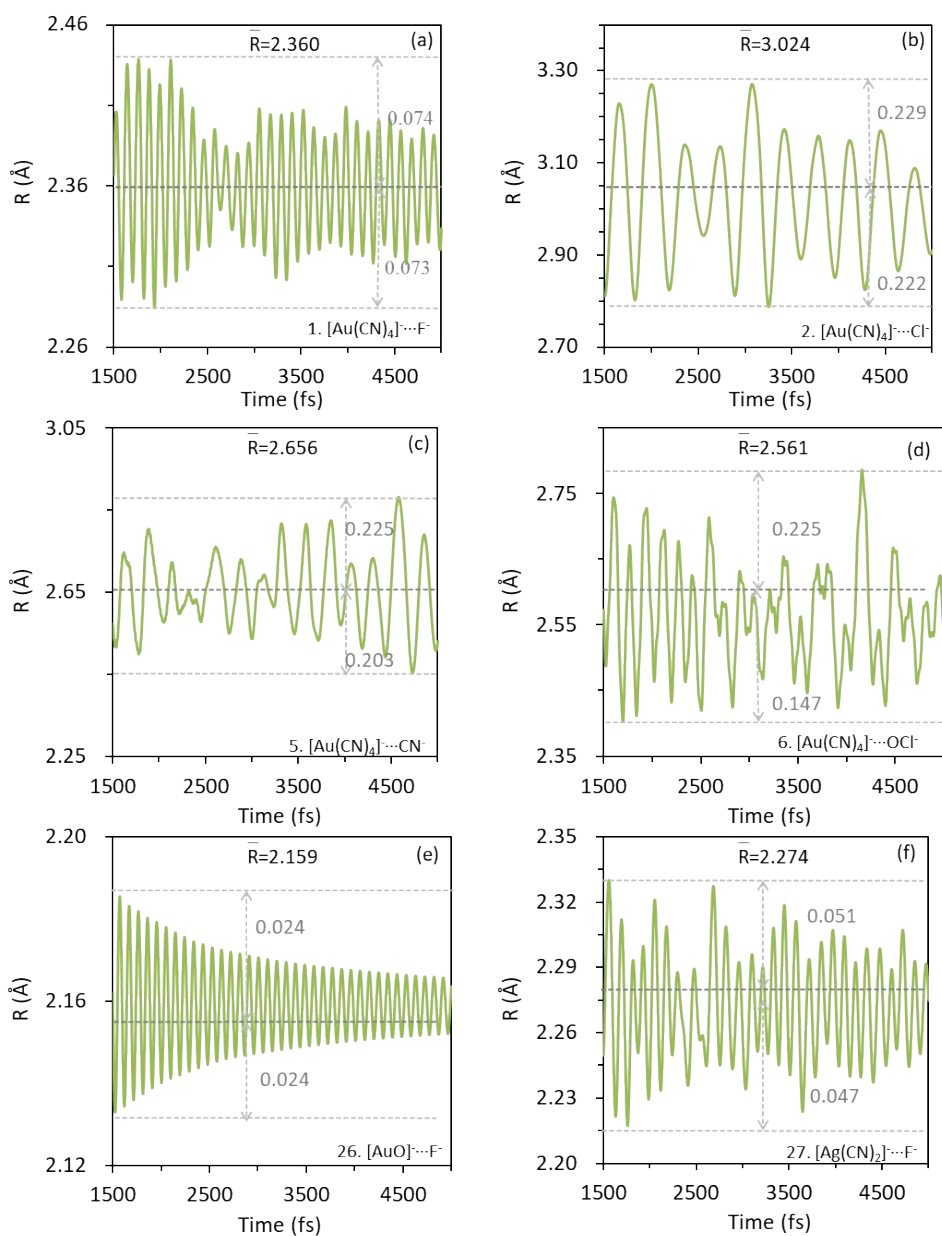

**Fig. S3. Evolutions of the inter-anion distance over time (after the 1500st fs) in the AIMD simulation, with the averaged value ( $\bar{R}$ ), and the corresponding maximal and minimum deviations denoted.**

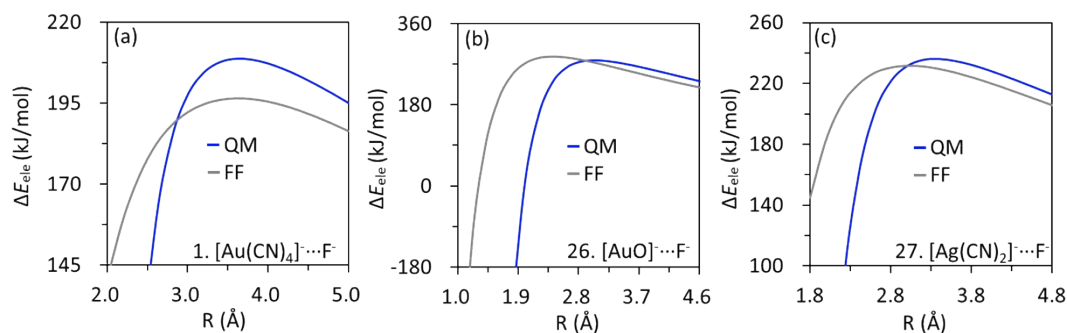

**Fig. S4.** The electrostatic interaction along the inter-anion distance calculated using the BLW-ED method (in blue) and AMOEBA polarizable force field (in grey).

### Additional Tables

**Table S1.** Polarizabilities (along the direction of CiBs) of optimized and deformed monomers ( $\alpha$ , in a.u.) at  $\omega$ B97x-D2/def2-TZVP(-PP) theoretical level.

| No. | Optimized monomer                   | $\alpha$ | No. | Deformed monomer                                        | $\alpha$ |
|-----|-------------------------------------|----------|-----|---------------------------------------------------------|----------|
| 1   | [Au(CN) <sub>4</sub> ] <sup>-</sup> | 115.564  | 1   | [Au(CN) <sub>4</sub> ] <sup>-</sup> ...F <sup>-</sup>   | 116.553  |
| 2   | -                                   | -        | 2   | [Au(CN) <sub>4</sub> ] <sup>-</sup> ...Cl <sup>-</sup>  | 116.070  |
| 5   | -                                   | -        | 5   | [Au(CN) <sub>4</sub> ] <sup>-</sup> ...CN <sup>-</sup>  | 116.500  |
| 6   | -                                   | -        | 6   | [Au(CN) <sub>4</sub> ] <sup>-</sup> ...OCl <sup>-</sup> | 116.238  |
| 25  | [Au(CN) <sub>2</sub> ] <sup>-</sup> | 101.970  | 25  | [Au(CN) <sub>2</sub> ] <sup>-</sup> ...F <sup>-</sup>   | 101.512  |
| 26  | [AuO] <sup>-</sup>                  | 71.843   | 26  | [AuO] <sup>-</sup> ...F <sup>-</sup>                    | 73.734   |
| 27  | [Ag(CN) <sub>2</sub> ] <sup>-</sup> | 91.148   | 27  | [Ag(CN) <sub>2</sub> ] <sup>-</sup> ...F <sup>-</sup>   | 85.049   |

**Table S2.** Amount of charge ( $\Delta Q$ ) transferred from the Lewis base to the acid, calculated using the NPA.

| No. | Complexes                                              | $\Delta Q$ | No. | Complexes                                               | $\Delta Q$ |
|-----|--------------------------------------------------------|------------|-----|---------------------------------------------------------|------------|
| 1   | [Au(CN) <sub>4</sub> ] <sup>-</sup> ...F <sup>-</sup>  | 0.146      | 6   | [Au(CN) <sub>4</sub> ] <sup>-</sup> ...OCl <sup>-</sup> | 0.122      |
| 2   | [Au(CN) <sub>4</sub> ] <sup>-</sup> ...Cl <sup>-</sup> | 0.143      | 26  | [AuO] <sup>-</sup> ...F <sup>-</sup>                    | 0.176      |
| 5   | [Au(CN) <sub>4</sub> ] <sup>-</sup> ...CN <sup>-</sup> | 0.258      | 27  | [Ag(CN) <sub>2</sub> ] <sup>-</sup> ...F <sup>-</sup>   | 0.138      |



**Table S3.** The distances ( $\text{\AA}$ ) of CiBs in the local minimum ( $R_{LM}$ ) and transition structure ( $R_{TS}$ ), and well-depthes (in kJ/mol) derived from the binding energy profiles calculated at RI-DLPNO-CCSD// $\omega$ B97x-D2/def2-TZVPD theoretical level.

| No. | Complexes                                        | $R_{LM}$ | $R_{TS}$ | $\Delta\Delta E_b$ |
|-----|--------------------------------------------------|----------|----------|--------------------|
| 1   | $[\text{Au}(\text{CN})_4]^- \cdots \text{F}^-$   | 2.400    | 4.000    | -41.3              |
| 2   | $[\text{Au}(\text{CN})_4]^- \cdots \text{Cl}^-$  | 3.000    | 4.200    | -8.2               |
| 5   | $[\text{Au}(\text{CN})_4]^- \cdots \text{CN}^-$  | 2.800    | 4.000    | -15.5              |
| 6   | $[\text{Au}(\text{CN})_4]^- \cdots \text{OCl}^-$ | 2.600    | 3.800    | -18.5              |
| 26  | $[\text{AuO}]^- \cdots \text{F}^-$               | 2.200    | 3.200    | -42.2              |
| 27  | $[\text{Ag}(\text{CN})_2]^- \cdots \text{F}^-$   | 2.400    | 3.400    | -13.7              |

**The xyz coordinates (in  $\text{\AA}$ ) of inter-anion CiBs optimized at  $\omega$ B97x-D2/def2-TZVP level of theory.**

1.  $[\text{Au}(\text{CN})_4]^- \cdots \text{F}^-$

|    |      |           |           |           |
|----|------|-----------|-----------|-----------|
| Au | 79.0 | -0.000461 | 0.000518  | 0.206966  |
| C  | 6.0  | 0.000034  | 2.014214  | 0.047677  |
| C  | 6.0  | 2.013240  | -0.000035 | 0.048304  |
| C  | 6.0  | 0.000031  | -2.013183 | 0.048338  |
| C  | 6.0  | -2.014157 | -0.000038 | 0.047716  |
| N  | 7.0  | 0.000909  | 3.158170  | -0.099547 |
| N  | 7.0  | -3.158109 | -0.001022 | -0.099543 |
| N  | 7.0  | 0.000900  | -3.157063 | -0.099557 |
| N  | 7.0  | 3.157125  | -0.001013 | -0.099552 |
| F  | 9.0  | -0.007496 | 0.008431  | 2.566647  |

2.  $[\text{Au}(\text{CN})_4]^- \cdots \text{Cl}^-$

|    |      |           |           |           |
|----|------|-----------|-----------|-----------|
| Au | 79.0 | -0.001224 | 0.000091  | 0.179272  |
| C  | 6.0  | -0.001554 | -2.011554 | 0.030113  |
| C  | 6.0  | 2.010583  | 0.000116  | 0.032782  |
| C  | 6.0  | -0.001554 | 2.011710  | 0.029687  |
| C  | 6.0  | -2.012679 | 0.000116  | 0.027058  |
| N  | 7.0  | -0.002046 | -3.151602 | -0.139194 |
| N  | 7.0  | -3.152482 | 0.000152  | -0.144088 |
| N  | 7.0  | -0.002046 | 3.151724  | -0.139878 |

|    |      |           |          |           |
|----|------|-----------|----------|-----------|
| N  | 7.0  | 3.150845  | 0.000153 | -0.134902 |
| Cl | 17.0 | -0.000222 | 0.000016 | 3.159124  |

5.  $[\text{Au}(\text{CN})_4]^- \cdots \text{CN}^-$

|    |      |           |           |           |
|----|------|-----------|-----------|-----------|
| Au | 79.0 | -0.004488 | 0.003146  | 0.191600  |
| C  | 6.0  | -0.003407 | 2.015299  | -0.001183 |
| C  | 6.0  | 2.009075  | 0.002465  | 0.012521  |
| C  | 6.0  | -0.003501 | -2.010101 | 0.009480  |
| C  | 6.0  | -2.016301 | 0.002412  | -0.004134 |
| N  | 7.0  | -0.002518 | 3.155430  | -0.171118 |
| N  | 7.0  | -3.156148 | 0.001845  | -0.175868 |
| N  | 7.0  | -0.002689 | -3.151148 | -0.154288 |
| N  | 7.0  | 3.150382  | 0.001950  | -0.149264 |
| N  | 7.0  | -0.020218 | 0.005275  | 3.975149  |
| C  | 6.0  | -0.015112 | 0.009541  | 2.812064  |

6.  $[\text{Au}(\text{CN})_4]^- \cdots \text{OCl}^-$

|    |      |           |           |           |
|----|------|-----------|-----------|-----------|
| Au | 79.0 | 0.000867  | -0.032056 | 0.222258  |
| C  | 6.0  | -0.010526 | 1.982920  | 0.121511  |
| C  | 6.0  | 2.011658  | -0.018133 | 0.054943  |
| C  | 6.0  | 0.012383  | -2.041277 | 0.039276  |
| C  | 6.0  | -2.013093 | -0.036587 | 0.102172  |
| N  | 7.0  | -0.014785 | 3.128968  | -0.002469 |
| N  | 7.0  | -3.156243 | -0.031735 | -0.044925 |
| N  | 7.0  | 0.023911  | -3.179679 | -0.141189 |
| N  | 7.0  | 3.152810  | -0.005628 | -0.107394 |
| O  | 8.0  | 0.157767  | 0.039570  | 2.751409  |
| Cl | 17.0 | -0.821687 | -0.938053 | 3.683199  |

26.  $[\text{AuO}]^- \cdots \text{F}^-$

|    |      |           |          |          |
|----|------|-----------|----------|----------|
| O  | 8.0  | -6.588535 | 0.261088 | 0.375474 |
| Au | 79.0 | -4.691261 | 0.366706 | 0.322788 |
| F  | 9.0  | -2.537374 | 0.472342 | 0.281211 |

27.  $[\text{Ag}(\text{CN})_2]^- \cdots \text{F}^-$

|    |      |           |           |           |
|----|------|-----------|-----------|-----------|
| Ag | 47.0 | 0.015377  | 0.713246  | 0.003829  |
| C  | 6.0  | 0.001692  | -0.074299 | 2.027078  |
| N  | 7.0  | -0.012517 | -0.539432 | 3.093811  |
| C  | 6.0  | 0.002080  | -0.064250 | -2.021569 |
| N  | 7.0  | -0.012545 | -0.529284 | -3.088288 |
| F  | 9.0  | 0.041293  | 2.996897  | 0.017302  |
